# Supplementary material for: CHIMERA repetitive mild traumatic brain injury induces chronic behavioural and neuropathological phenotypes in wild-type and APP/PS1 mice
Source: PubMed Central journal article supplement (PMC6330571; doi:10.1186/s13195-018-0461-0), 2019-01-12

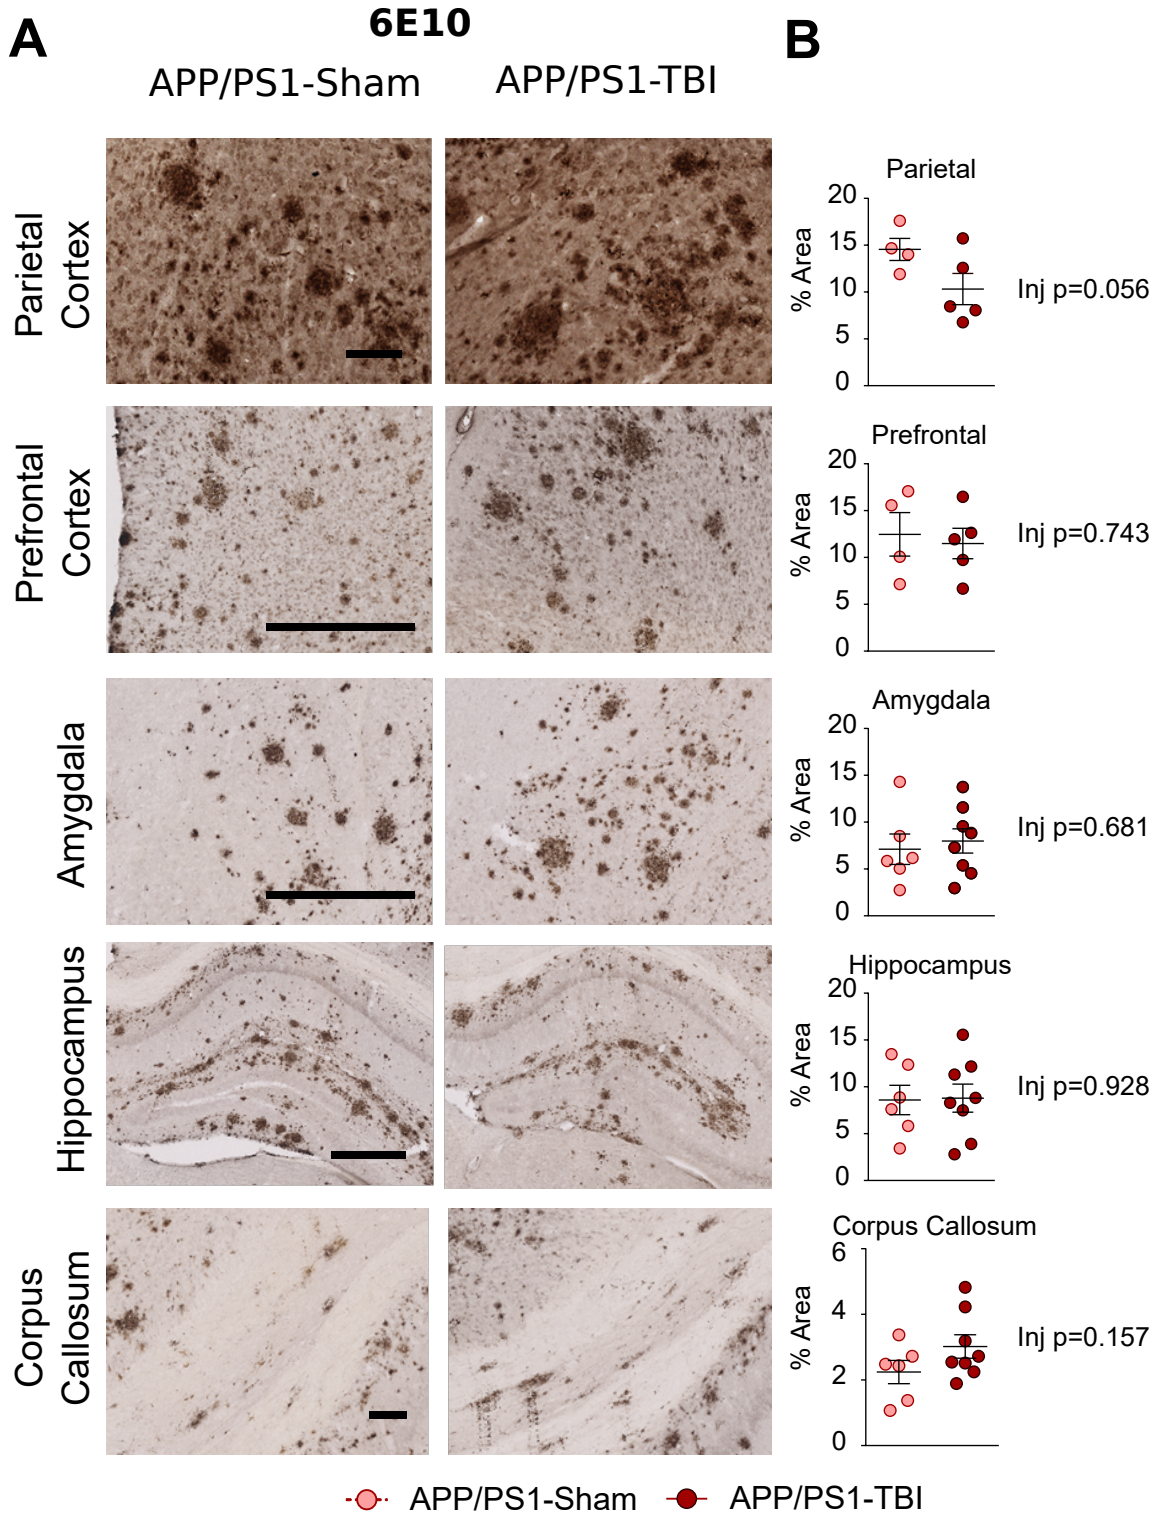

Supplement: 13195_2018_461_MOESM5_ESM.pdf [file 13195_2018_461_MOESM5_ESM.pdf]
